# Supplementary figures and images for: Time to SARS-CoV-2 PCR clearance in immunocompromising conditions: is test-based removal from isolation necessary in severely immunocompromised individuals?
Source: PubMed Central journal article supplement — Open Forum Infect Dis. 2021 May 20:ofab164. doi: 10.1093/ofid/ofab164 (PMC8231388; doi:10.1093/ofid/ofab164), 2021-05-20

Probability of Positive SARS-CoV-2 PCR test

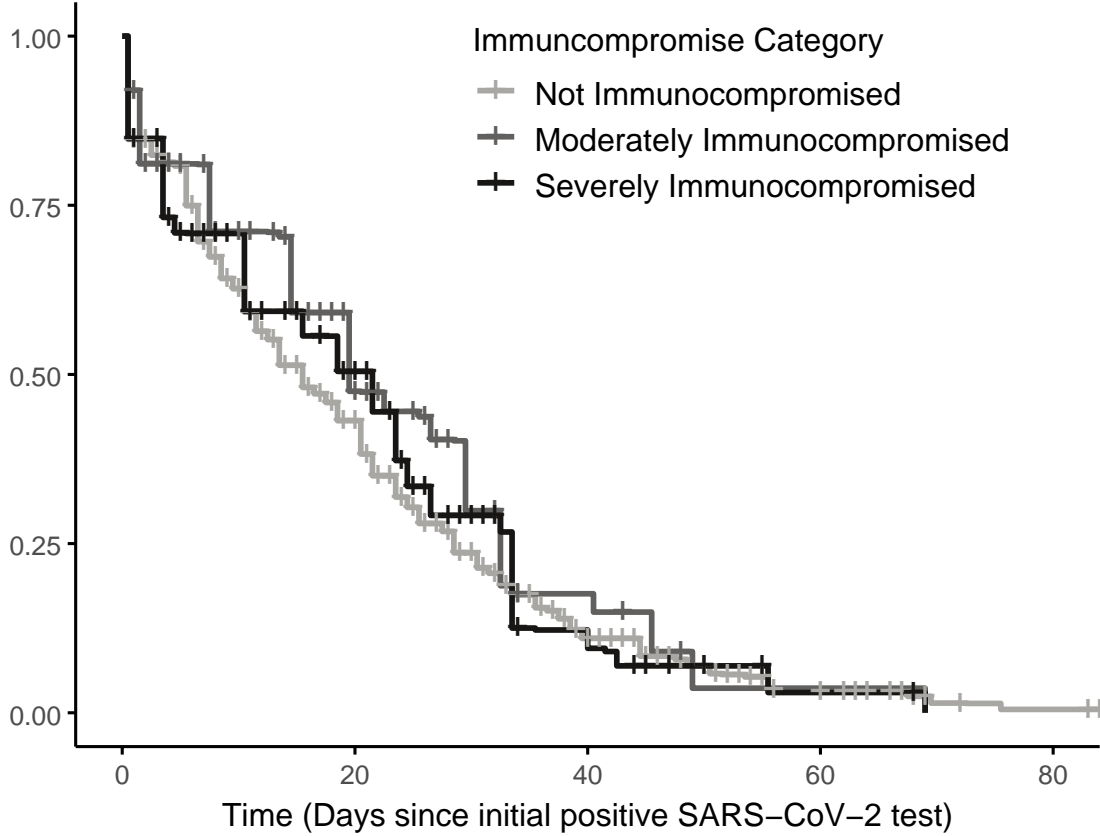

Immunocompromise Category

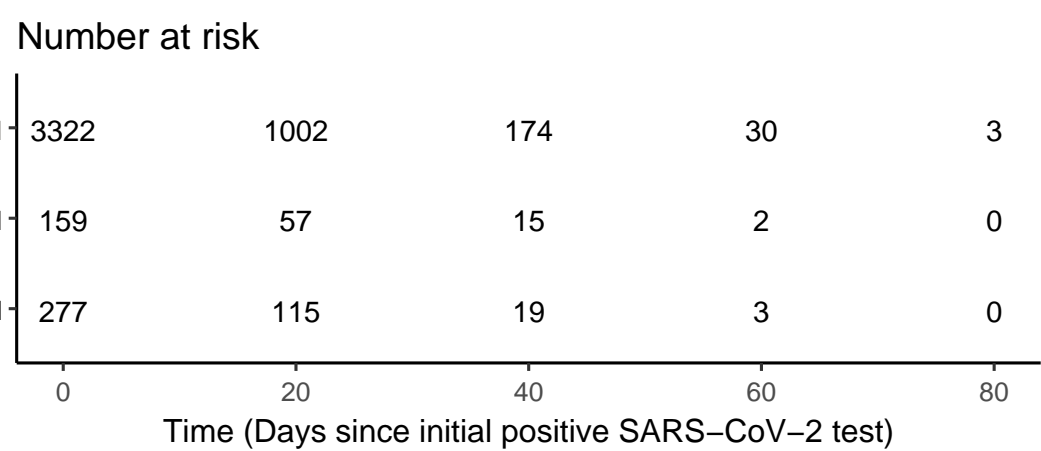

Supplement: ofab164_suppl_supplementary_figure_s1.pdf [file ofab164_suppl_supplementary_figure_s1.pdf]

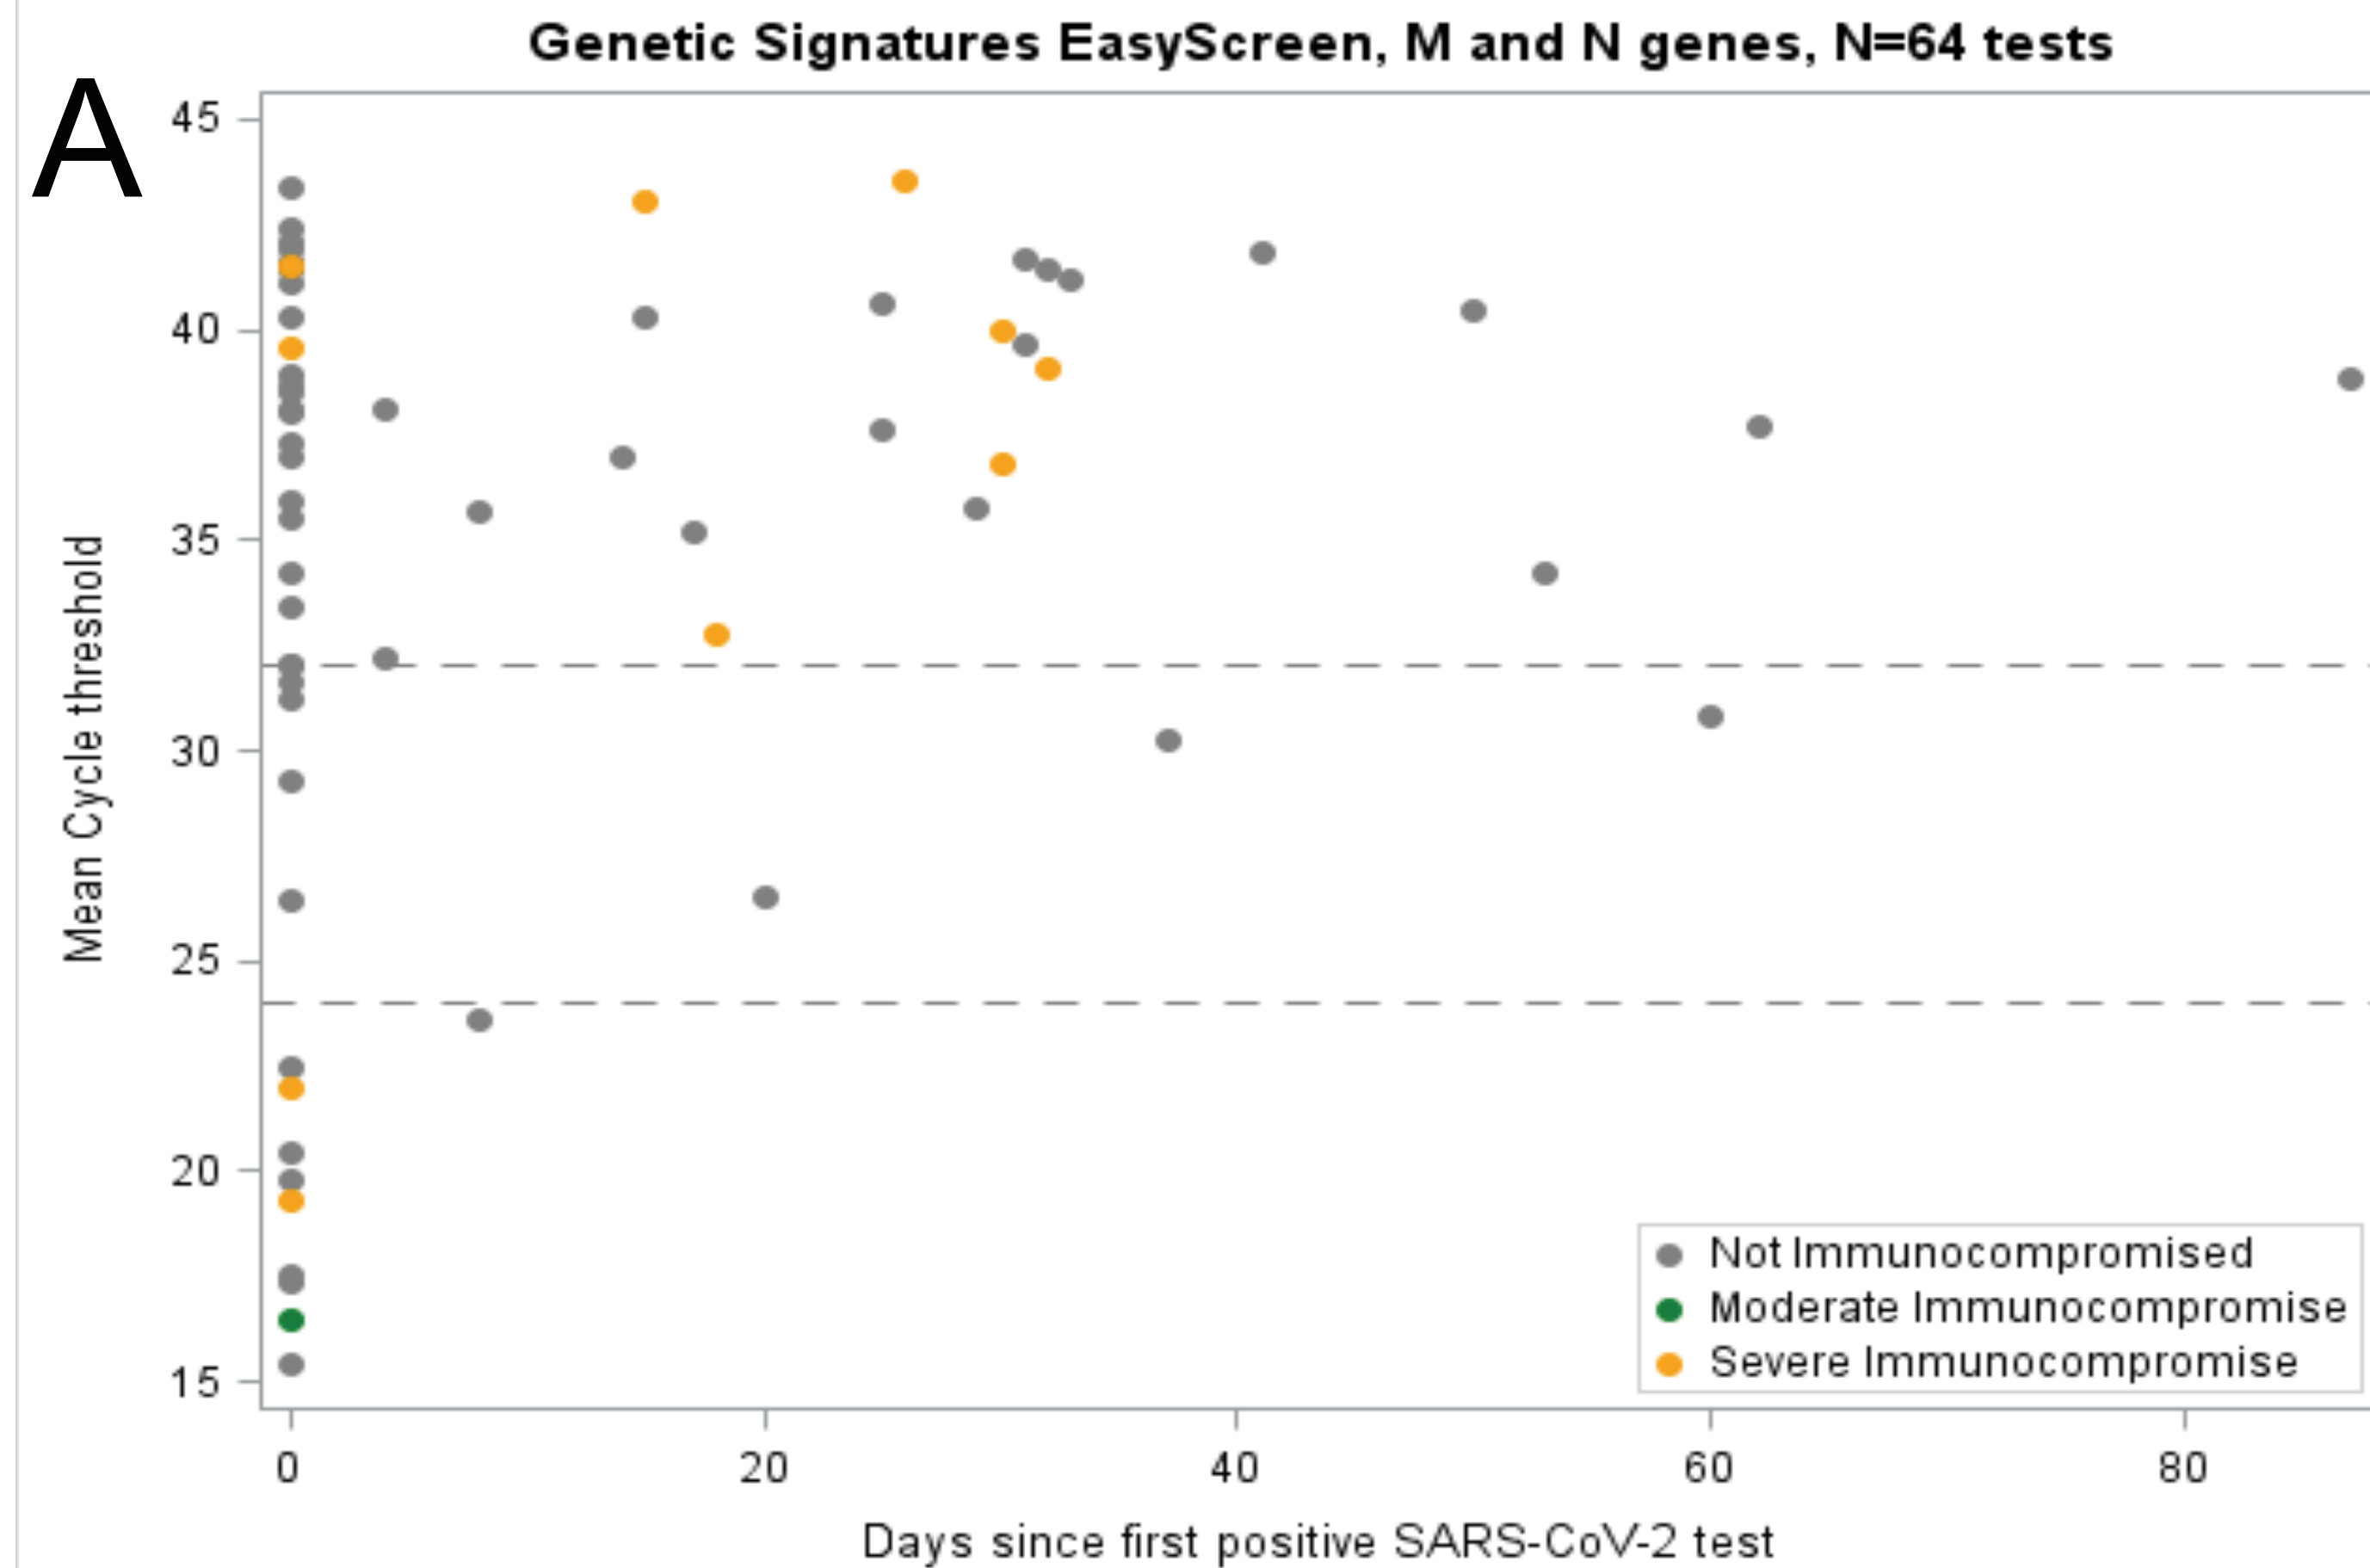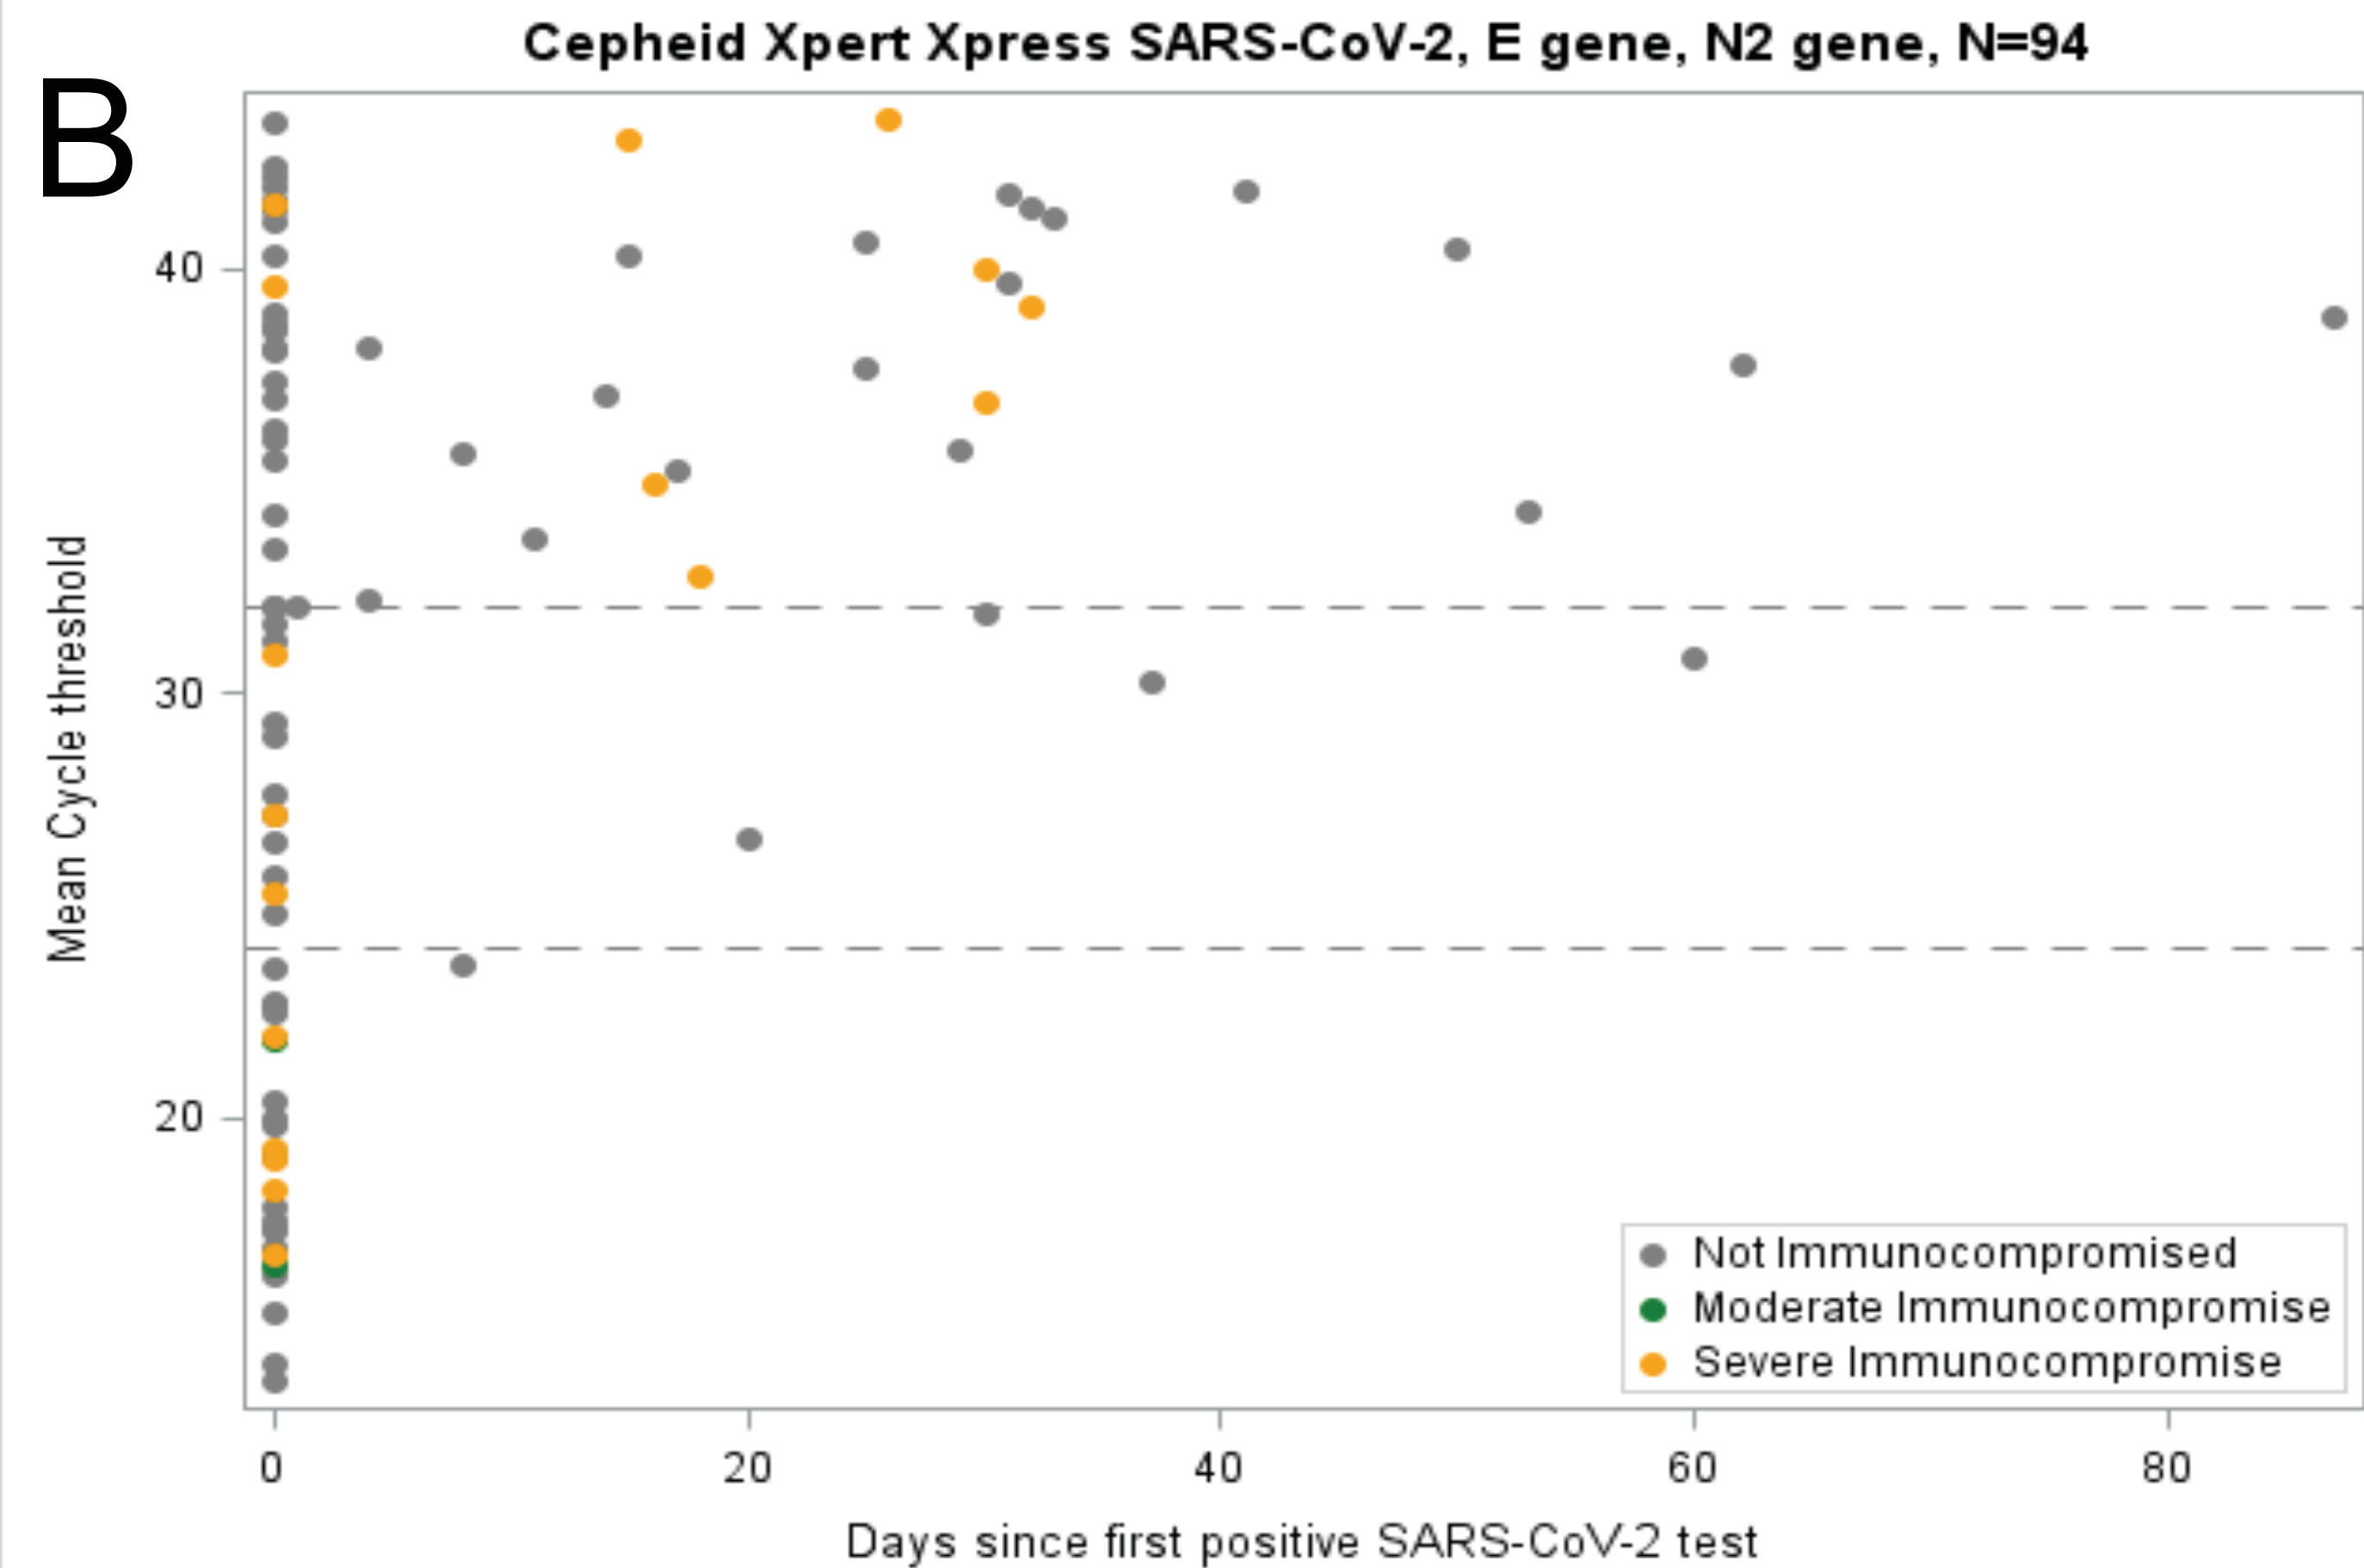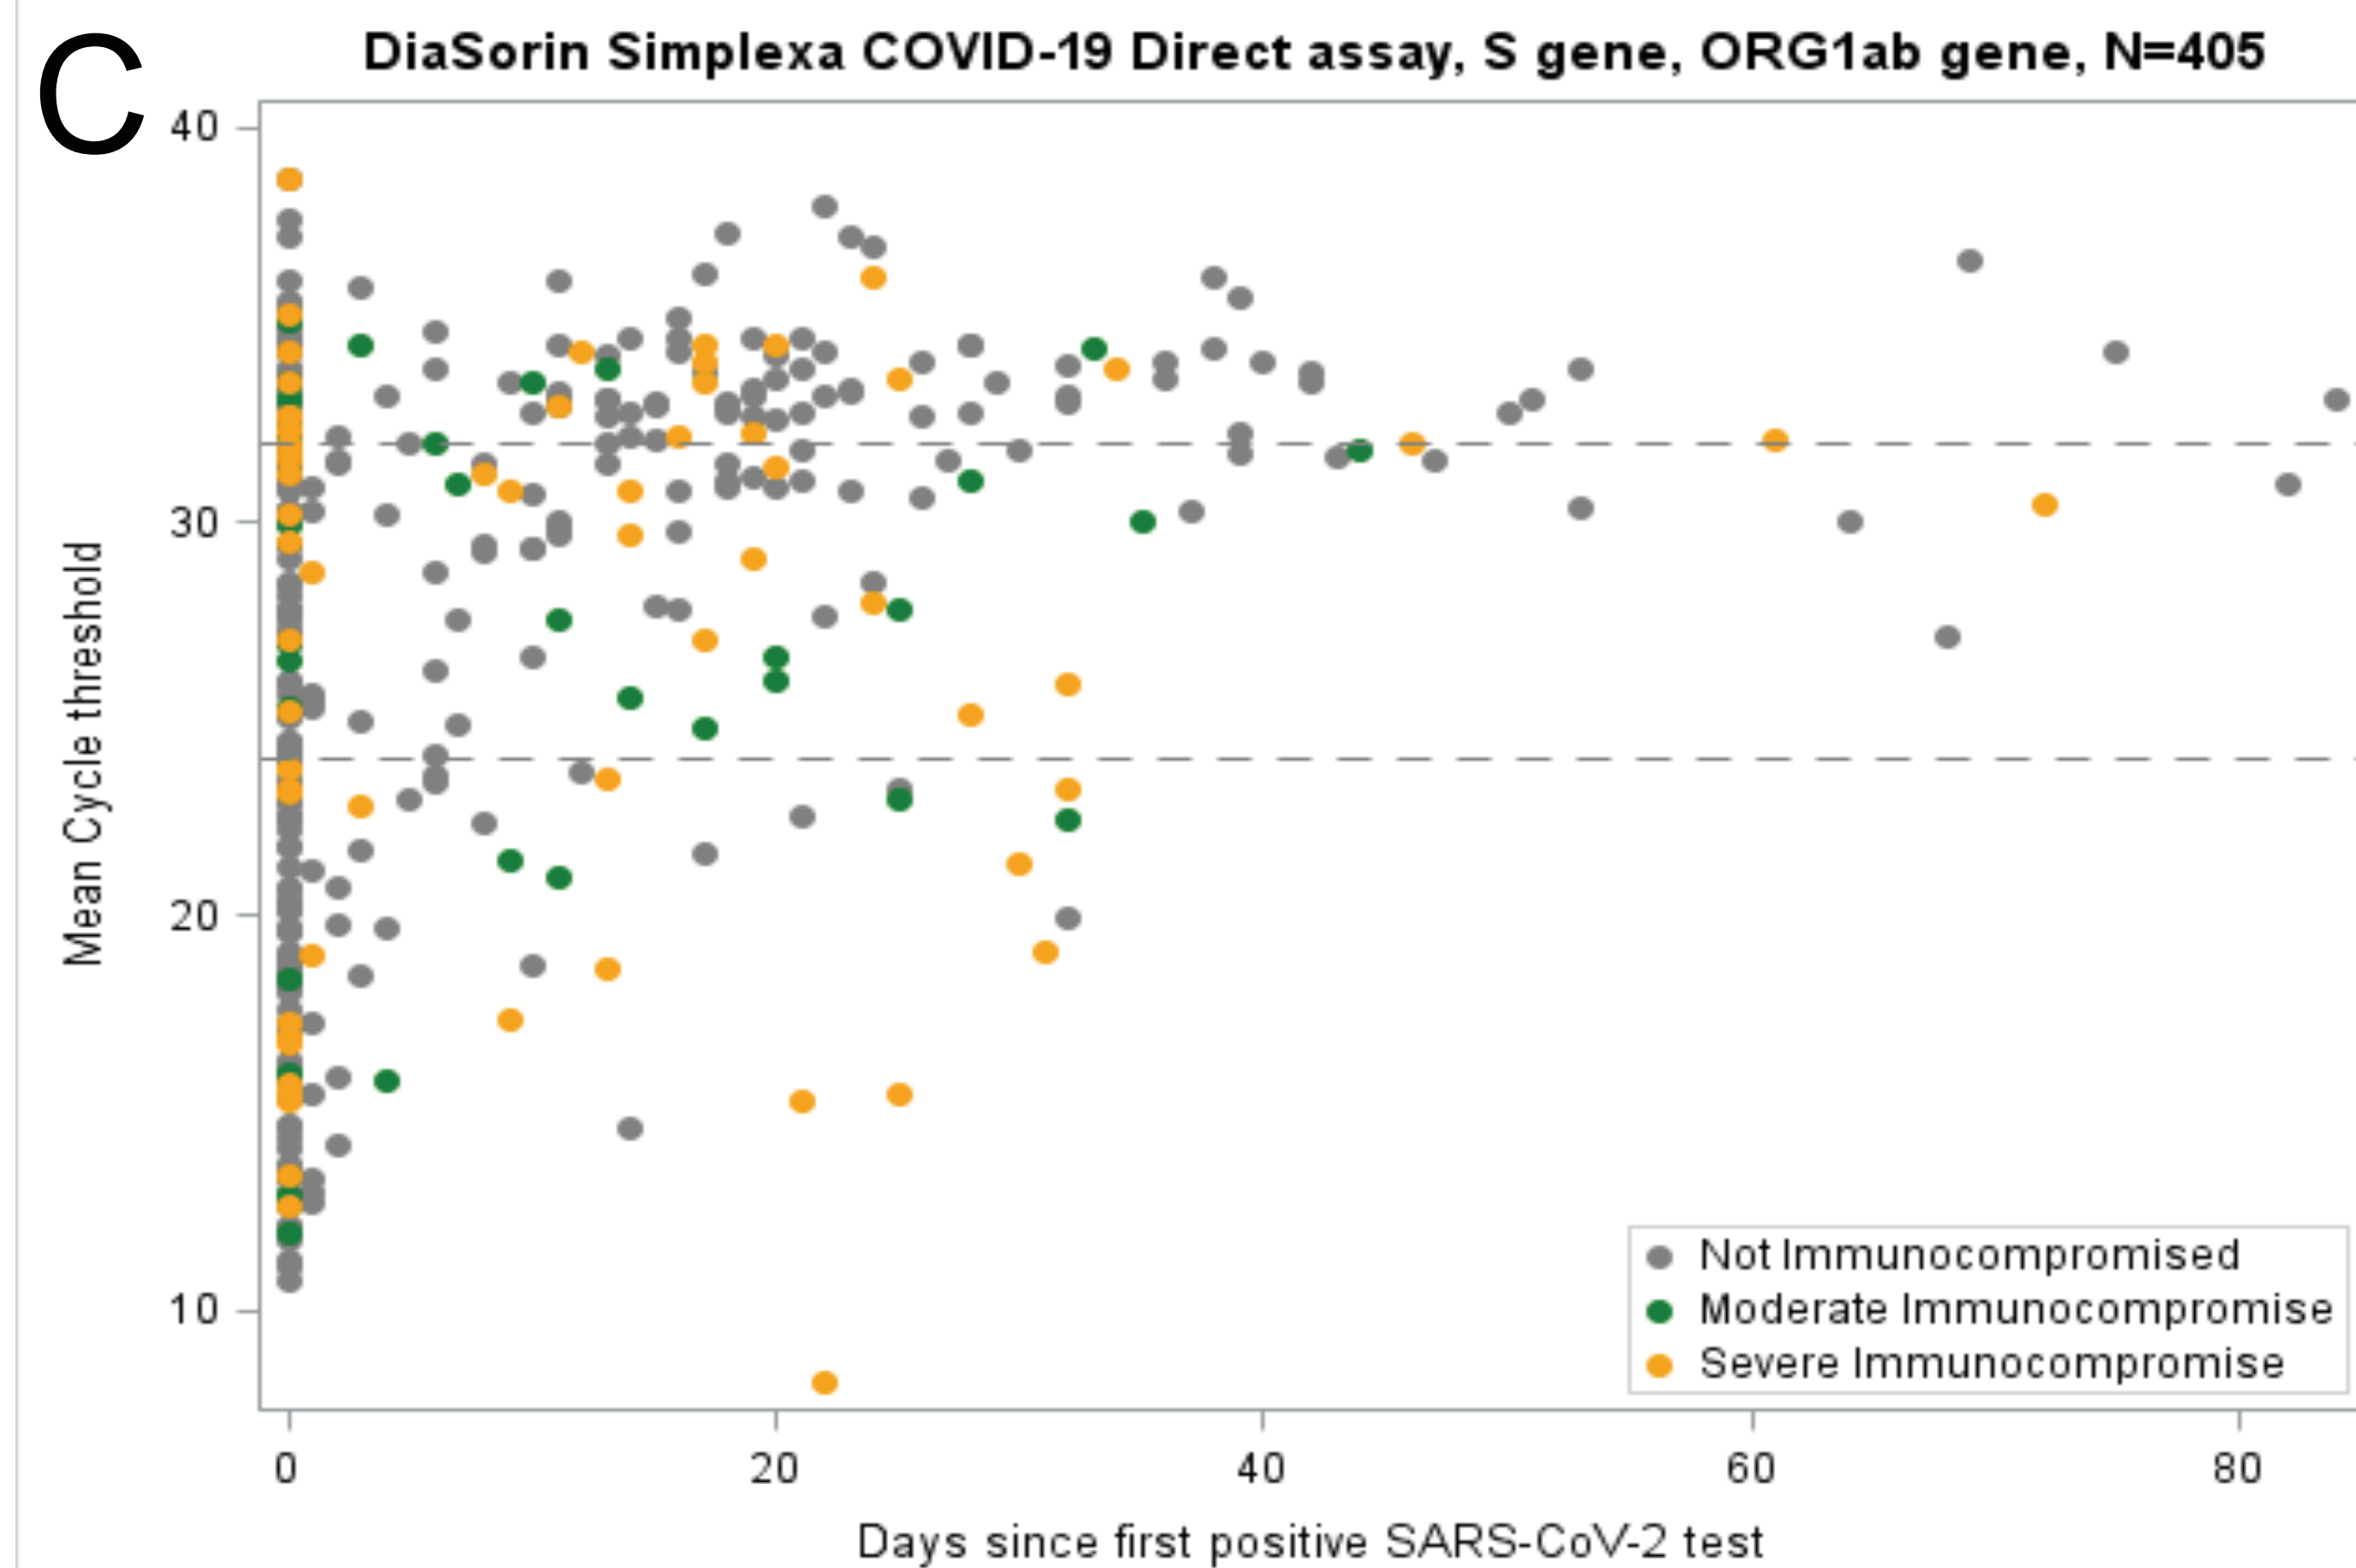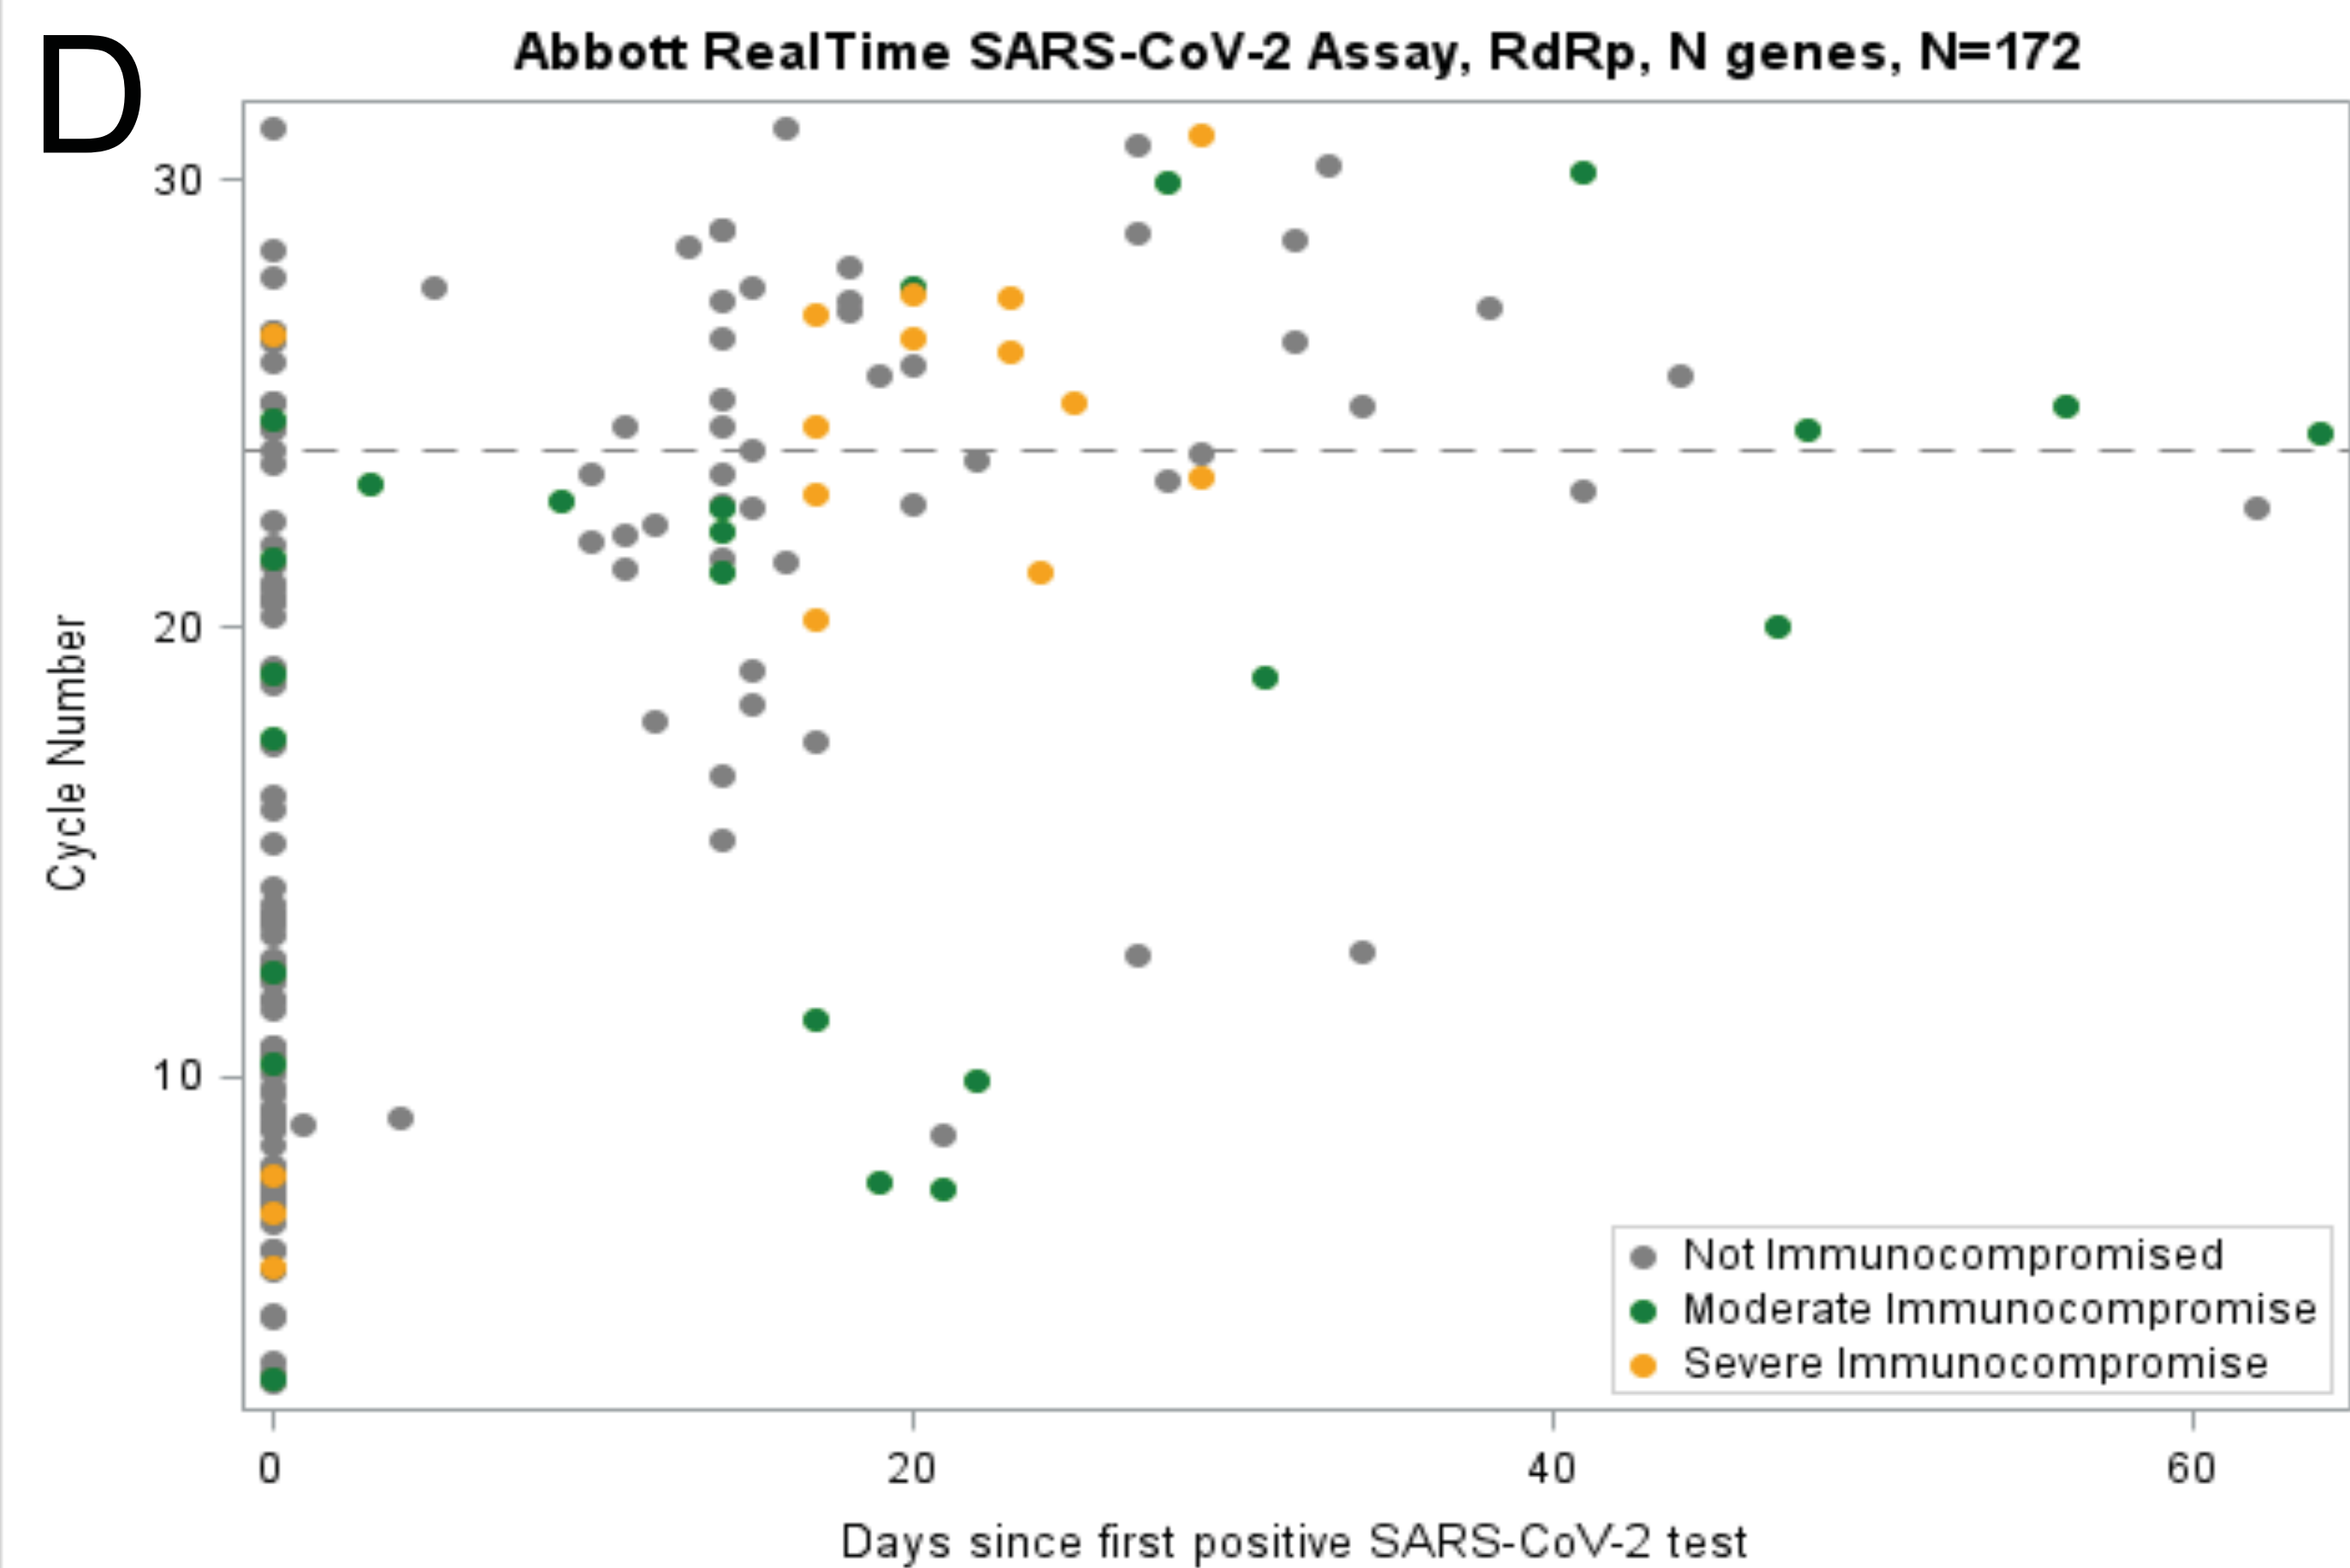

Supplement: ofab164_suppl_supplementary_figure_s2.pdf [file ofab164_suppl_supplementary_figure_s2.pdf]
